# Supplementary material for: FGF23 regulates renal sodium handling and blood pressure
Source: PubMed Central journal article supplement (PMC4203353; doi:10.1002/emmm.201303716), 2014-05-05
Supplement: emmm0006-0744-sd1.pdf [file emmm0006-0744-sd1.pdf]

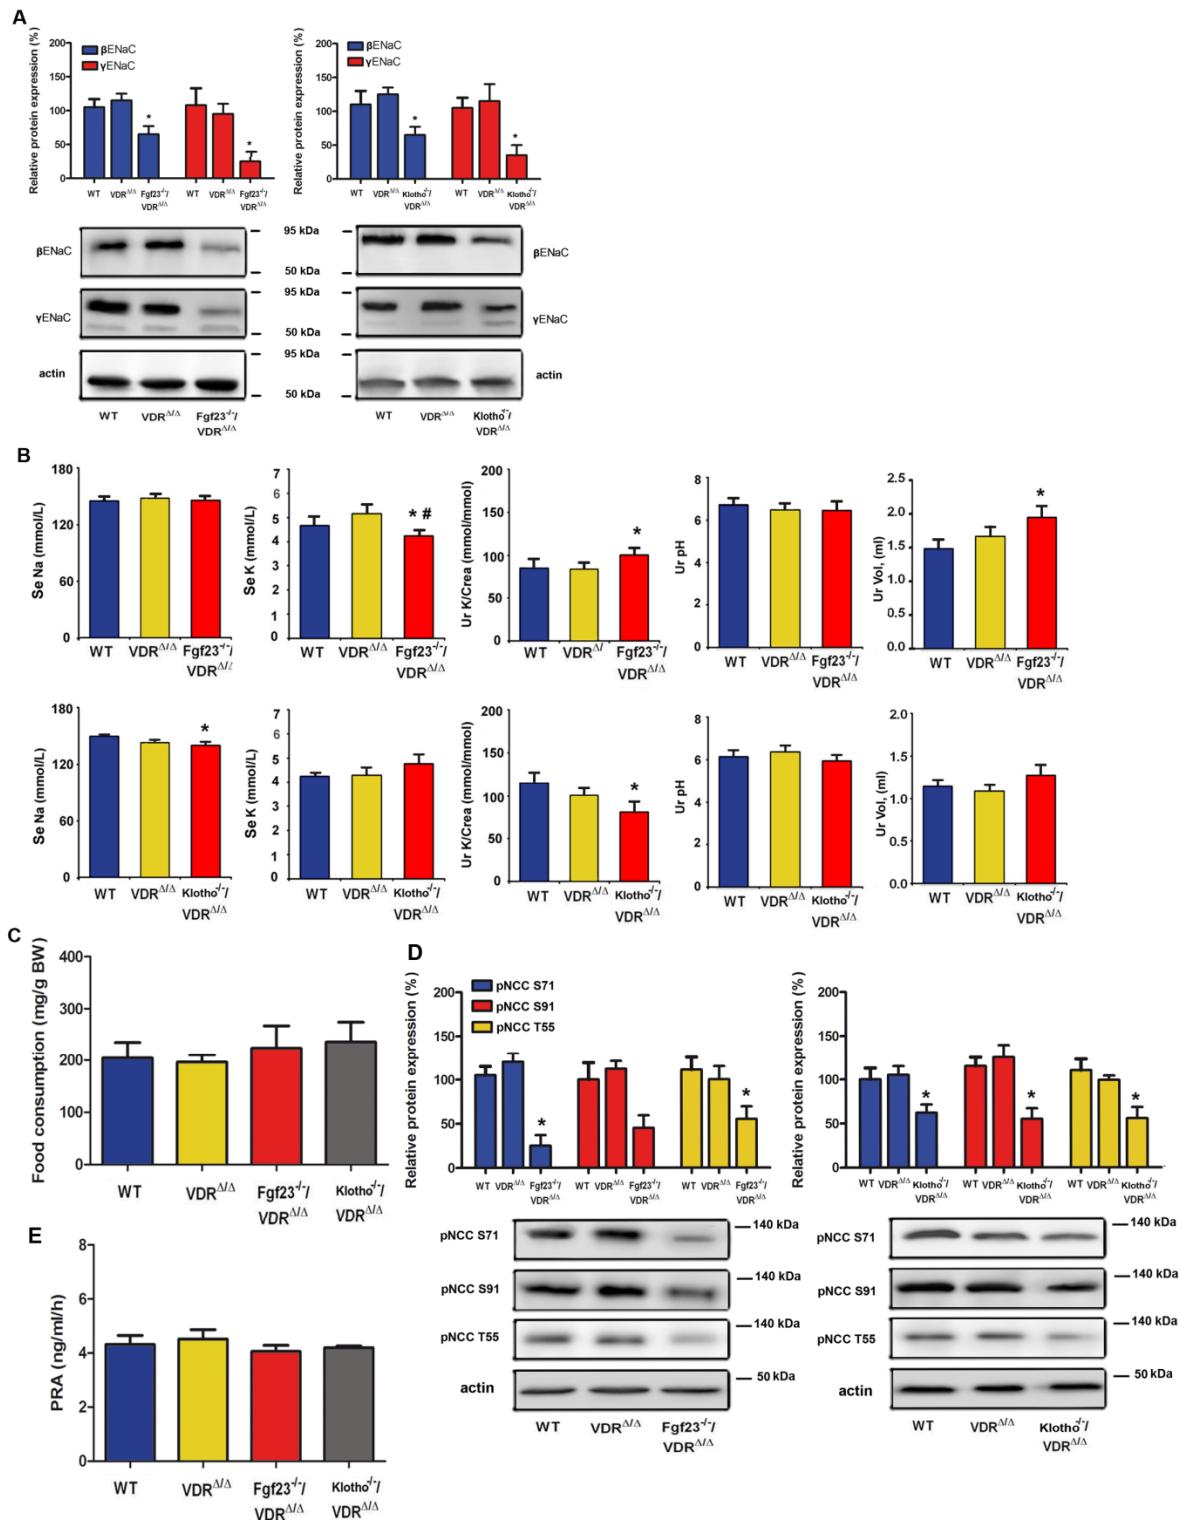

**Supplementary Figure 1. Andrukhova et al.**

**Supplementary Figure S1. Regulation of sodium and potassium homeostasis in 9-month-old *Fgf23*<sup>-/-</sup>/*VDR*<sup>Δ/Δ</sup> and *Klotho*<sup>-/-</sup>/*VDR*<sup>Δ/Δ</sup> compound mutants.** (A) Western blotting quantification of renal membrane expression of the full length  $\beta$  and  $\gamma$  subunits of ENaC in 9-month-old male wild-type (WT), *VDR*<sup>Δ/Δ</sup>, *Fgf23*<sup>-/-</sup>/*VDR*<sup>Δ/Δ</sup> and *Klotho*<sup>-/-</sup>/*VDR*<sup>Δ/Δ</sup> double mutant mice on the rescue diet (n=8-10, 1-way ANOVA followed by SNK test, \*  $p < 0.05$  vs. WT). (B) Serum Na<sup>+</sup> concentration, serum potassium (K<sup>+</sup>) concentration, urinary potassium excretion corrected by urinary creatinine (Crea), urinary pH and urinary volume over a 12-

hour sampling period in 9-month-old male wild-type (WT),  $VDR^{\Delta/\Delta}$ ,  $Fgf23^{-/-}/VDR^{\Delta/\Delta}$ , or  $Kl^{-/-}/VDR^{\Delta/\Delta}$  compound mutant mice (n=8-12, 1-way ANOVA followed by SNK test, \*  $p < 0.05$  vs. WT). (C) Mean food consumption of 9-month-old male wild-type,  $VDR^{\Delta/\Delta}$ ,  $Fgf23^{-/-}/VDR^{\Delta/\Delta}$ , and  $Kl^{-/-}/VDR^{\Delta/\Delta}$  compound mutant mice measured over a period of 7 days (n=6-8). (D) Western blotting quantification of NCC phosphorylation at Ser71, Ser91 and Thr55 (pNCC S71, S91 and T55) in renal cortical total membrane fractions (n=6-8) and (E) plasma renin activity assay in 9-month-old male wild-type,  $VDR^{\Delta/\Delta}$ ,  $Fgf23^{-/-}/VDR^{\Delta/\Delta}$ , and  $Kl^{-/-}/VDR^{\Delta/\Delta}$  compound mutant mice (n=7-8, 1-way ANOVA followed by SNK test, \*  $p < 0.005$  vs. WT). Data represent mean  $\pm$  s.e.m
