# Supplementary material for: FGF23 regulates renal sodium handling and blood pressure
Source: PubMed Central journal article supplement (PMC4203353; doi:10.1002/emmm.201303716), 2014-05-05
Supplement: emmm0006-0744-sd2.pdf [file emmm0006-0744-sd2.pdf]

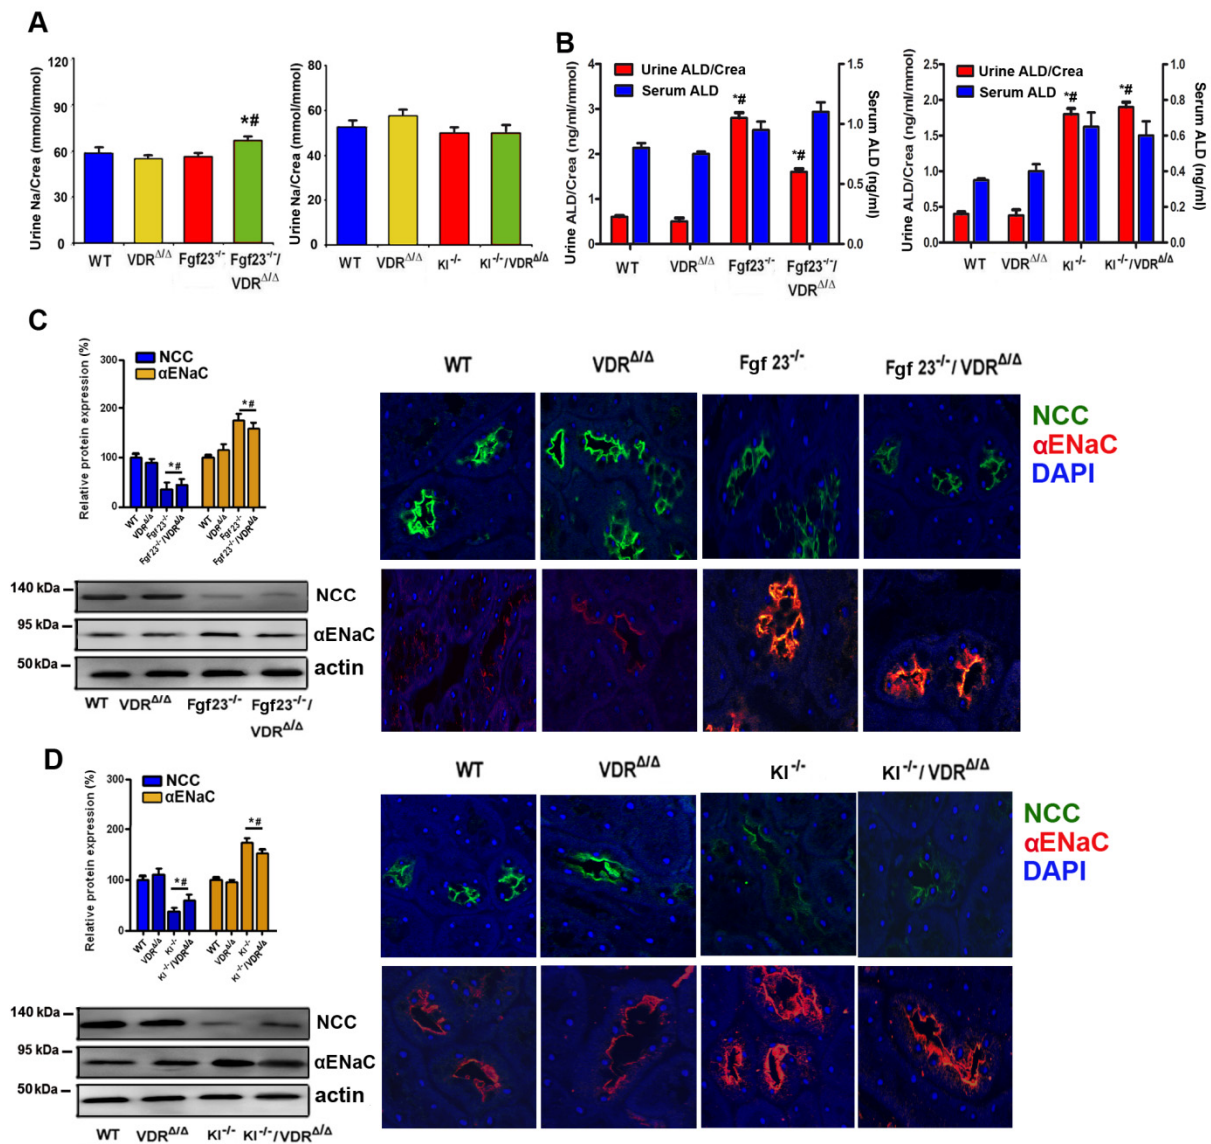

Supplementary Figure 2. Andrukhova et al.

**Supplementary Figure S2. *Fgf23* or *Klotho* deficiency downregulates renal NCC expression but upregulates aldosterone and renal  $\alpha$ ENaC expression in 4-week-old mice.** (A) Urinary Na<sup>+</sup> excretion corrected by urinary creatinine (Crea) (n=8-12, 1-way ANOVA followed by SNK test, \*  $p < 0.05$  vs. WT, #  $p < 0.05$  vs. VDR<sup>Δ/Δ</sup> mice), (B) urinary aldosterone corrected by urinary creatinine and serum aldosterone concentrations measured by ELISA (n=8-12, 1-way ANOVA followed by SNK test, \*  $p < 0.005$  vs. WT, #  $p < 0.005$  vs. VDR<sup>Δ/Δ</sup> mice), (C-D) Western blotting analysis in renal cortical total membrane fractions of NCC and  $\alpha$ ENaC protein expression (n=5-7, 1-way ANOVA followed by SNK test, \*  $p < 0.005$  vs. WT, #  $p < 0.05$  vs. VDR<sup>Δ/Δ</sup> mice) and immunohistochemical detection of NCC and  $\alpha$ ENaC protein expression in paraffin sections of paraformaldehyde-fixed kidneys in 4-week-old male and female wild-type (WT), VDR<sup>Δ/Δ</sup>, Fgf23<sup>-/-</sup>, KI<sup>-/-</sup>, Fgf23<sup>-/-</sup>/VDR<sup>Δ/Δ</sup>, or KI<sup>-/-</sup>/VDR<sup>Δ/Δ</sup> compound mutant mice on rescue diet (n=5-6). Data represent mean  $\pm$  s.e.m.
