# Supplementary material for: FGF23 regulates renal sodium handling and blood pressure
Source: PubMed Central journal article supplement (PMC4203353; doi:10.1002/emmm.201303716), 2014-05-05
Supplement: emmm0006-0744-sd3.pdf [file emmm0006-0744-sd3.pdf]

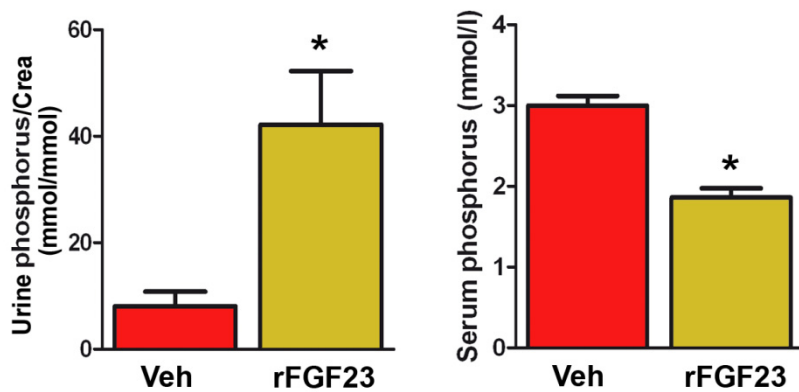

Supplementary Figure 3. Andrukhova et al.

**Supplementary Figure S3. Treatment of wild-type mice with rFGF23 induces hyperphosphaturia and hypophosphatemia.** Urinary phosphorus excretion corrected for urinary creatinine, and serum phosphorus concentration in 3-month-old wild-type mice treated for 5 days with vehicle (Veh) or rFGF23 (10  $\mu\text{g}/\text{mouse}$ ) (n=5-6, Student's t-test, \* urine  $p = 0.0078$ , serum  $p = 0.0037$ ). Data represent mean  $\pm$  s.e.m.
