# Supplementary material for: FGF23 regulates renal sodium handling and blood pressure
Source: PubMed Central journal article supplement (PMC4203353; doi:10.1002/emmm.201303716), 2014-05-05
Supplement: emmm0006-0744-sd4.pdf [file emmm0006-0744-sd4.pdf]

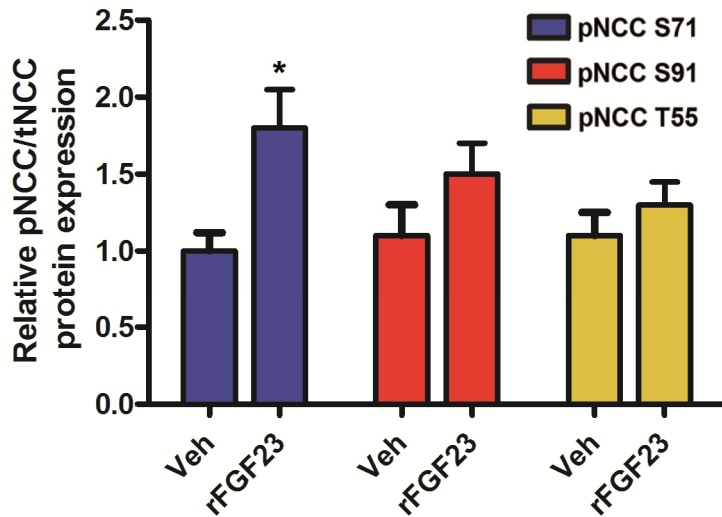

Supplementary Figure 4. Andrukhova et al.

**Supplementary Figure S4. FGF23 activates renal NCC phosphorylation predominantly at serine 71.**

Western blotting quantification of NCC phosphorylation at Ser71, Ser91 and Thr55 (pNCC S71, S91 and T55) normalized to total NCC (tNCC) expression in renal cortical total membrane fractions from 3-month-old wild-type mice treated for 5 days with vehicle (Veh) or rFGF23 (10  $\mu\text{g}/\text{mouse}$ ) (n=5-6, Student's t-test, \* urine  $p = 0.0168$  vs. vehicle). Data represent mean  $\pm$  s.e.m.
