# Supplementary material for: FGF23 regulates renal sodium handling and blood pressure
Source: PubMed Central journal article supplement (PMC4203353; doi:10.1002/emmm.201303716), 2014-05-05
Supplement: emmm0006-0744-sd5.pdf [file emmm0006-0744-sd5.pdf]

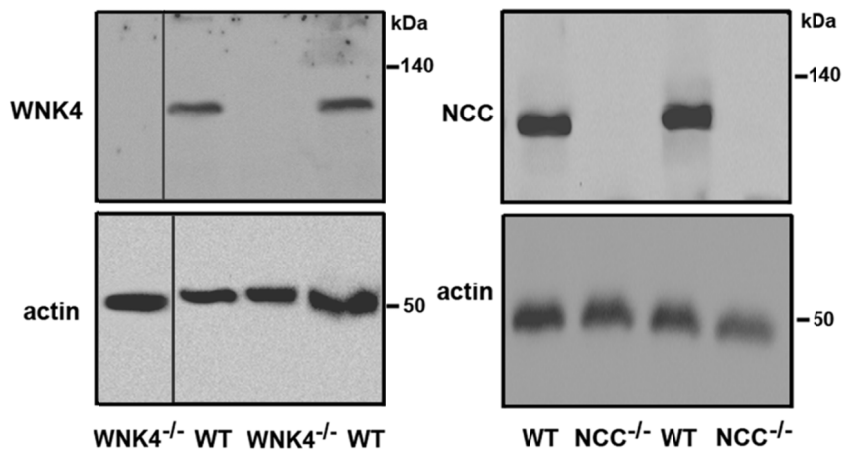

Supplementary Figure 5. Andrukhova. et al.

**Supplementary Figure S5. Anti-WNK4 and anti-NCC antibodies used in the present study are specific.** Specificity of the anti-WNK4 and anti-NCC antibodies was controlled by Western blot analysis of renal total protein extracts from 2-month-old male wild-type, WNK4<sup>-/-</sup> and NCC<sup>-/-</sup> mice, respectively. Frame in Western blot image indicates splicing event.
