# Supplementary material for: FGF23 regulates renal sodium handling and blood pressure
Source: PubMed Central journal article supplement (PMC4203353; doi:10.1002/emmm.201303716), 2014-05-05
Supplement: emmm0006-0744-sd6.pdf [file emmm0006-0744-sd6.pdf]

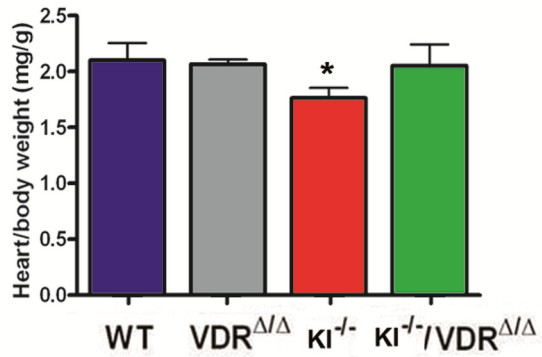

Supplementary Figure 6. Andrukhova et al.

**Supplementary Figure S6. Heart/body weight ratio is reduced in *Klotho*-ablated mice.** Heart/body weight ratio in 4-week-old male and female wild-type (WT), VDR<sup>Δ/Δ</sup>, KI<sup>-/-</sup>, and KI<sup>-/-</sup>/VDR<sup>Δ/Δ</sup> compound mutant mice on rescue diet (n=8-12, 1-way ANOVA followed by SNK test, \*  $p = 0.0351$  vs. WT mice). Data represent mean  $\pm$  s.e.m.
