# Supplementary material for: FGF23 regulates renal sodium handling and blood pressure
Source: PubMed Central journal article supplement (PMC4203353; doi:10.1002/emmm.201303716), 2014-05-05
Supplement: emmm0006-0744-sd7.pdf [file emmm0006-0744-sd7.pdf]

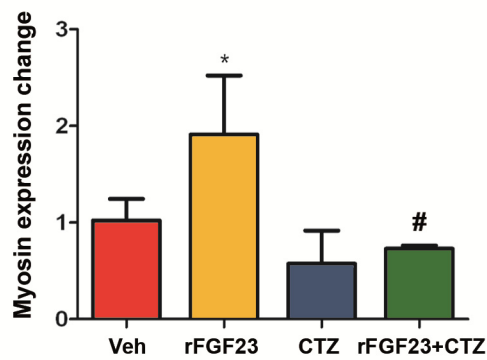

Supplementary Figure 7. Andrukhova et al.

**Supplementary Figure S7. Co-treatment of mice with rFGF23 and chlorothiazide abrogates the rFGF23-induced elevation of cardiac  $\beta$ -myosin heavy chain expression.** Cardiac  $\beta$ -myosin heavy chain expression in 3-month-old male wild-type mice treated for 5 days with vehicle (Veh), recombinant FGF23 (10  $\mu$ g per mouse per day), or chlorothiazide (CTZ, 25 mg/kg) alone or in combination (n=8-10, 1-way ANOVA followed by SNK test, \*  $p = 0.0275$  vs. vehicle, #  $p = 0.0123$  vs. rFGF23). Data represent mean  $\pm$  s.e.m.
