# Supplementary material for: FGF23 regulates renal sodium handling and blood pressure
Source: PubMed Central journal article supplement (PMC4203353; doi:10.1002/emmm.201303716), 2014-05-05
Supplement: emmm0006-0744-sd10.pdf [file emmm0006-0744-sd10.pdf]

## **Supplementary video legends**

**Supplementary video S1.** Time-dependent changes in intracellular fluorescence in distal tubules in a SFBI-loaded, 300- $\mu\text{m}$ -thick, live kidney slice from of a 3-month-old wild-type mouse treated at time 0 with rFGF23 (100 ng/ml) *in vitro*. After 105 min, 10  $\mu\text{M}$  of the NCC inhibitor chlorothiazide (CTZ) or vehicle (PBS + 1% ethanol) was added. Due to unavoidable delays caused by sample handling, 8 frames ( $\sim$  4 min) are missing after addition of CTZ.

**Supplementary video S2.** Time-dependent changes in intracellular fluorescence in distal tubules in a SFBI-loaded, 300- $\mu\text{m}$ -thick, live kidney slice from of a 3-month-old wild-type mouse treated at time 0 with vehicle (PBS) *in vitro*. After 105 min, 10  $\mu\text{M}$  of the NCC inhibitor chlorothiazide (CTZ) or vehicle (PBS + 1% ethanol) was added. Due to unavoidable delays caused by sample handling, 8 frames ( $\sim$  4 min) are missing after addition of CTZ.
