# Supplementary material for: FGF23 regulates renal sodium handling and blood pressure
Source: PubMed Central journal article supplement (PMC4203353; doi:10.1002/emmm.201303716), 2014-05-05

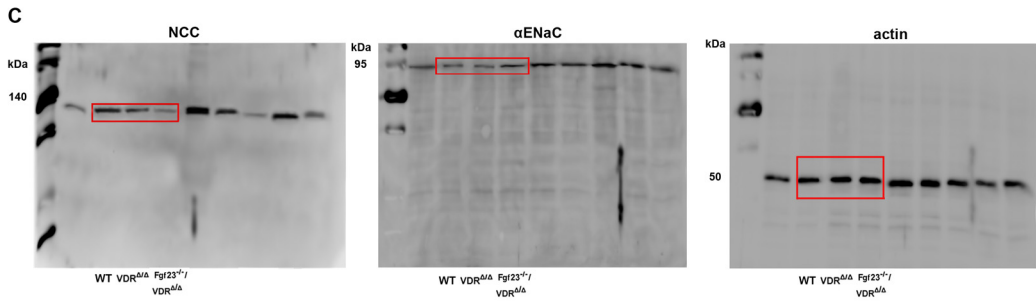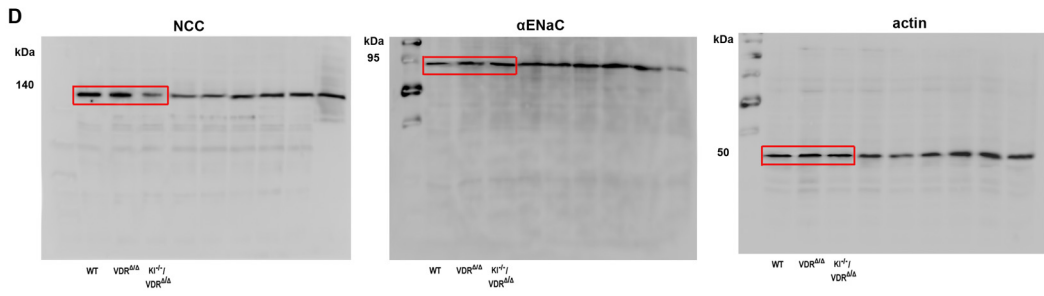

Supplement: emmm0006-0744-sd12.pdf [file emmm0006-0744-sd12.pdf]
